# Supplementary material
Source: PubMed Central journal article supplement (PMC2940576)
Supplement: supp_nop042_nop042supp.pdf [file supp_nop042_nop042supp.pdf]

**Supplemental Figure 1.** Individual trends in pGSK $\beta$  levels from baseline through six weeks of enzastaurin therapy in 17 patients with GBM.

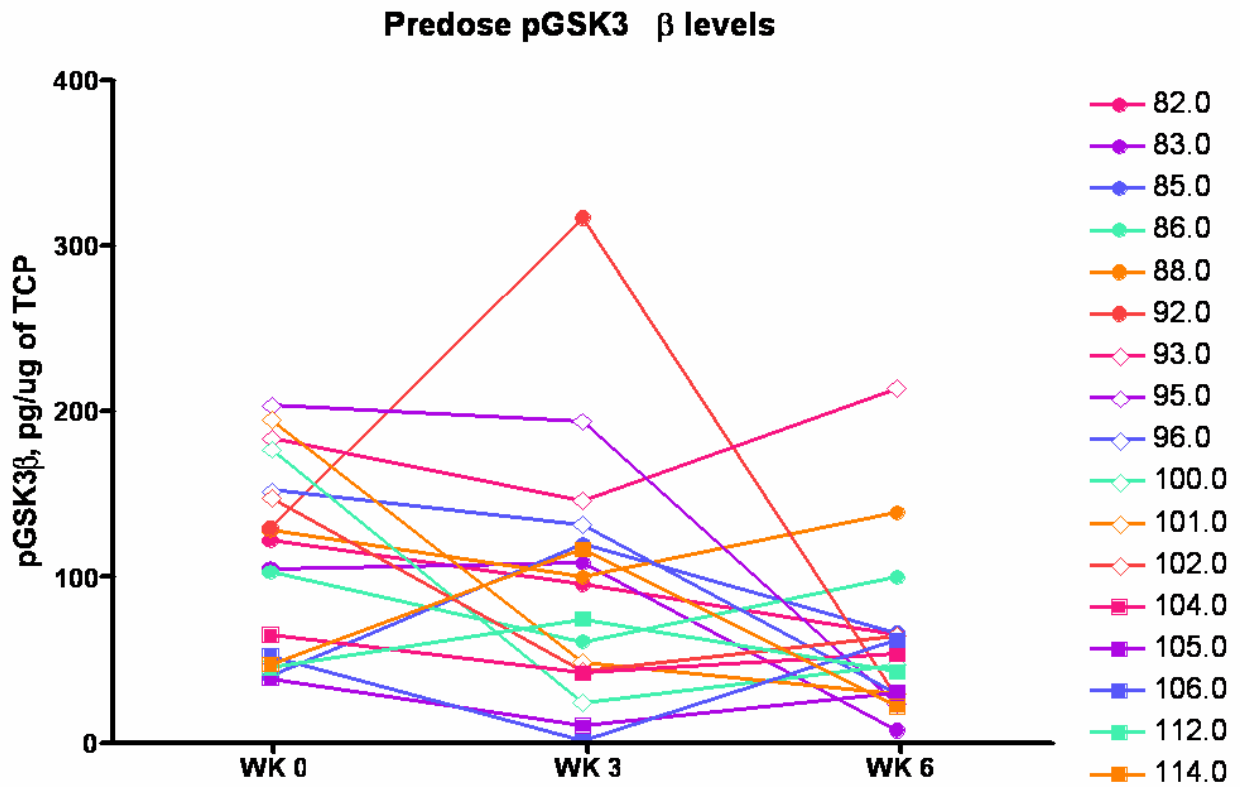

Supplemental figure 1
